# Supplementary material for: Reduction-responsive and tumor-targeted polyprodrug nanocarriers for targeting therapy of hepatocellular carcinoma
Source: Royal Society of Chemistry journal article supplement (doi:10.1039/d3nj05674k), 2024-01-01

## Supporting Information

### Reduction-responsive and tumour-targeted polyprodrug nanocarriers for targeting therapy of hepatocellular carcinoma

Wei Shi,<sup>a</sup> XiaoQing Xu,<sup>a</sup> JinYuan Tian,<sup>a</sup> ZiYi Zhang<sup>a</sup> and ZhanJun Liu<sup>\*a</sup>

a. School of Pharmacy, North China University of Science and Technology, Tangshan  
063210, China.

E-mail address of Corresponding author: liuzhanjun@ncst.edu.cn

1. Table S1 Nanoparticle size, PDI, zeta potential and critical aggregation concentration (CAC) affected by HA-SS-PFA at different ratios

| HA-SS@PFA | Size (nm)   | Zeta (mV)     | PDI           | CAC (mg·mL <sup>-1</sup> ) |
|-----------|-------------|---------------|---------------|----------------------------|
| 2:1       | 247.4 ± 4.1 | -23.45 ± 0.23 | 0.432 ± 0.023 | 0.0821                     |
| 1:1       | 163.4 ± 3.2 | -25.61 ± 0.35 | 0.255 ± 0.014 | 0.0604                     |
| 1:2       | 145.4 ± 2.8 | -27.70 ± 0.12 | 0.195 ± 0.064 | 0.0589                     |
| 1:3       | 178.9 ± 3.6 | -19.13 ± 0.74 | 0.188 ± 0.042 | 0.0642                     |
| 1:4       | 220.2 ± 1.5 | -20.43 ± 0.63 | 0.367 ± 0.031 | 0.0974                     |

2. The content of DOX in nano-preparation was determined by HPLC.

Chromatographic conditions: Diamonsil C18 column (250 mm × 4.6 mm, 5.0 μm); mobile phase: acetonitrile–2% glacial acetic acid solution (v/v = 35/65); flow rate: 1.0 mL·min<sup>-1</sup>; UV detection wavelength: 481 nm; sample size: 20 μL; column temperature: 30°C.

3. Zeta potential graphs of HA-SS-PFA NPs (a) and DOX@HA-SS-PFA NPs (b).

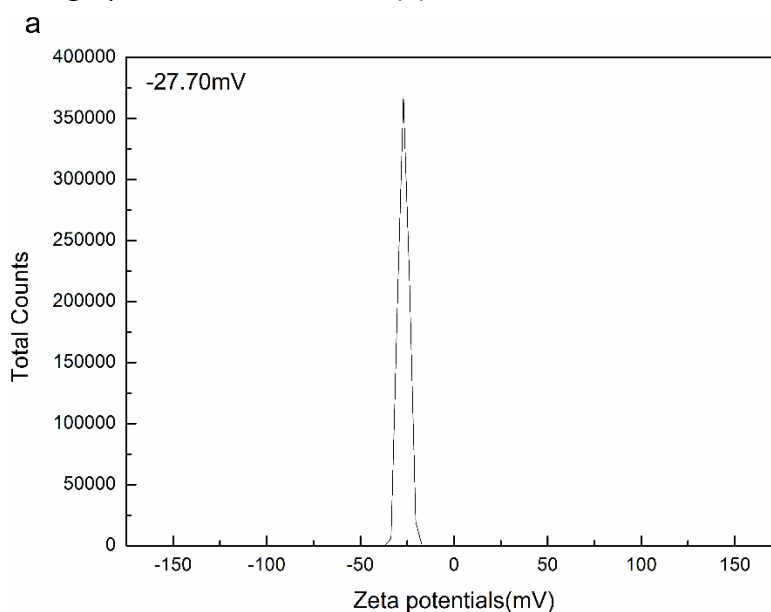

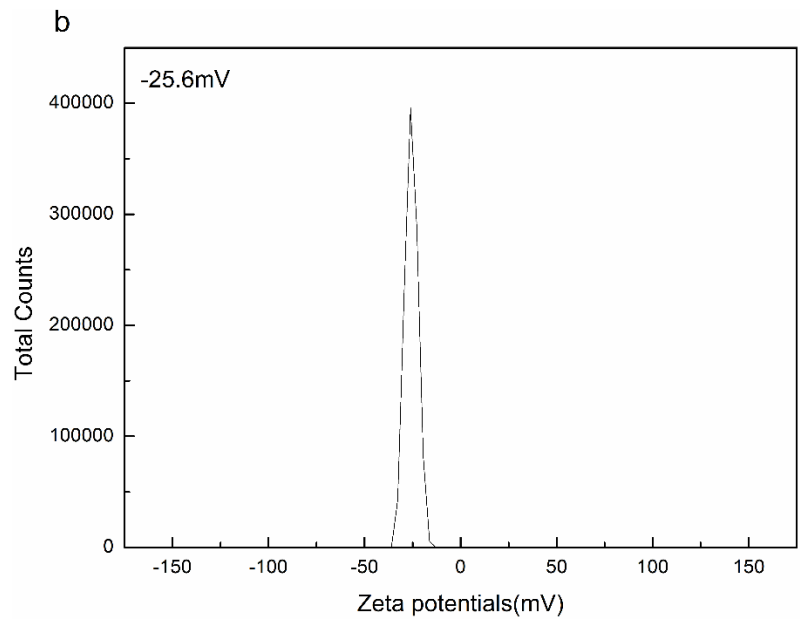

#### 4. Critical aggregation concentration (CAC) of HA-SS-PFA NPs.

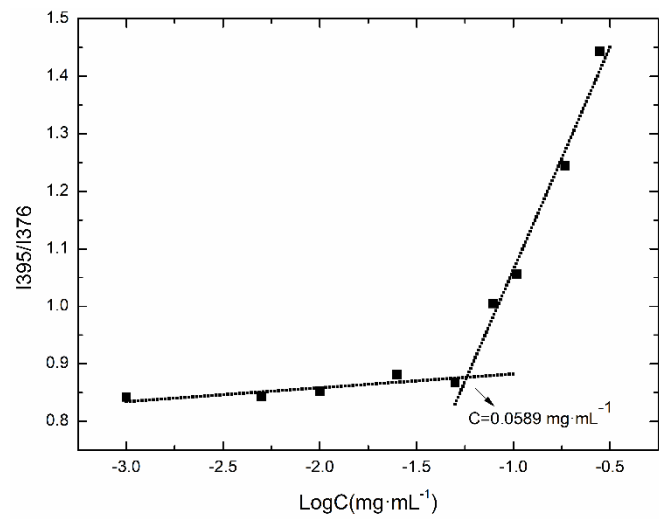

Supplement: d3nj05674k1.pdf [file d3nj05674k1.pdf]
